# Supplementary material for: MOF-Zn-NHC as an efficient N-heterocyclic carbene catalyst for aerobic oxidation of aldehydes to their corresponding carboxylic acids via a cooperative geminal anomeric based oxidation
Source: Royal Society of Chemistry journal article supplement (doi:10.1039/d1ra05494e), 2021-01-01
Supplement: d1ra05494e1.pdf [file d1ra05494e1.pdf]

## Supporting information

**MOF-Zn-NHC as an efficient *N*-heterocyclic carbene catalyst for aerobic oxidation of aldehydes to their corresponding carboxylic acids *via* a cooperative geminal anomeric based oxidation**

Saeed babae, Mahmoud Zarei,\* Mohammad Ali Zolfigol\*

Department of Organic Chemistry, Faculty of Chemistry, Bu-Ali Sina University, Hamedan 6517838683, Tel: +988138282807, Fax: +988138380709 Iran. E-Mail: [zolfi@basu.ac.ir](mailto:zolfi@basu.ac.ir) & [mzolfigol@yahoo.com](mailto:mzolfigol@yahoo.com), (M. A. Zolfigol) or [mahmoud8103@yahoo.com](mailto:mahmoud8103@yahoo.com) (M. Zarei). [Saeed.babai@yahoo.com](mailto:Saeed.babai@yahoo.com).

|                                                                                                          |    |
|----------------------------------------------------------------------------------------------------------|----|
| <b>Scheme S1:</b> Preparation of MOF-Zn-NHC as <i>N</i> -Heterocyclic carbene.....                       | 3  |
| <b>Figure S1:</b> XRD diagram for the MOF-Zn-NHC (Blue line) in compare with MOF-Zn-NHC (Red line) ..... | 3  |
| FT-IR spectrum of 4-methylbenzoic acid.....                                                              | 4  |
| <sup>1</sup> H NMR spectrum of 4-methylbenzoic acid .....                                                | 5  |
| <sup>13</sup> C NMR spectrum of 4-methylbenzoic acid .....                                               | 5  |
| FT-IR spectrum of 4-methoxybenzoic acid.....                                                             | 5  |
| <sup>1</sup> H NMR spectrum of 4-methoxybenzoic acid.....                                                | 6  |
| <sup>13</sup> C NMR spectrum of 4-methoxybenzoic acid .....                                              | 6  |
| FT-IR spectrum of 3-methylbenzoic acid.....                                                              | 7  |
| <sup>1</sup> H NMR spectrum of 3-methylbenzoic acid .....                                                | 7  |
| FT-IR spectrum of 4-chlorobenzoic acid.....                                                              | 8  |
| <sup>1</sup> H NMR spectrum of 4-chlorobenzoic acid .....                                                | 8  |
| <sup>13</sup> C NMR spectrum of 4-chlorobenzoic acid .....                                               | 9  |
| FT-IR spectrum of cinnamic acid .....                                                                    | 9  |
| <sup>1</sup> H NMR spectrum of cinnamic acid.....                                                        | 10 |
| FT-IR spectrum of 2-chlorobenzoic acid.....                                                              | 10 |
| <sup>1</sup> H NMR spectrum of 2-chlorobenzoic acid .....                                                | 11 |
| FT-IR spectrum of 4-fluorobenzoic acid .....                                                             | 11 |
| <sup>1</sup> H NMR spectrum of 4-fluorobenzoic acid.....                                                 | 12 |
| <sup>1</sup> H NMR spectrum of 4-nitrobenzoic acid .....                                                 | 12 |
| <sup>1</sup> H NMR spectrum of 4-nitrobenzoic acid .....                                                 | 13 |
| <sup>13</sup> C NMR spectrum of 4-nitrobenzoic acid .....                                                | 13 |
| FT-IR spectrum of 4-hydroxybenzoic acid.....                                                             | 14 |
| <sup>1</sup> H NMR spectrum of 4-hydroxybenzoic acid .....                                               | 14 |
| <sup>13</sup> C NMR spectrum of 4-hydroxybenzoic acid .....                                              | 15 |
| FT-IR spectrum of Isophthalic acid.....                                                                  | 15 |
| <sup>1</sup> H NMR spectrum of Isophthalic acid.....                                                     | 16 |

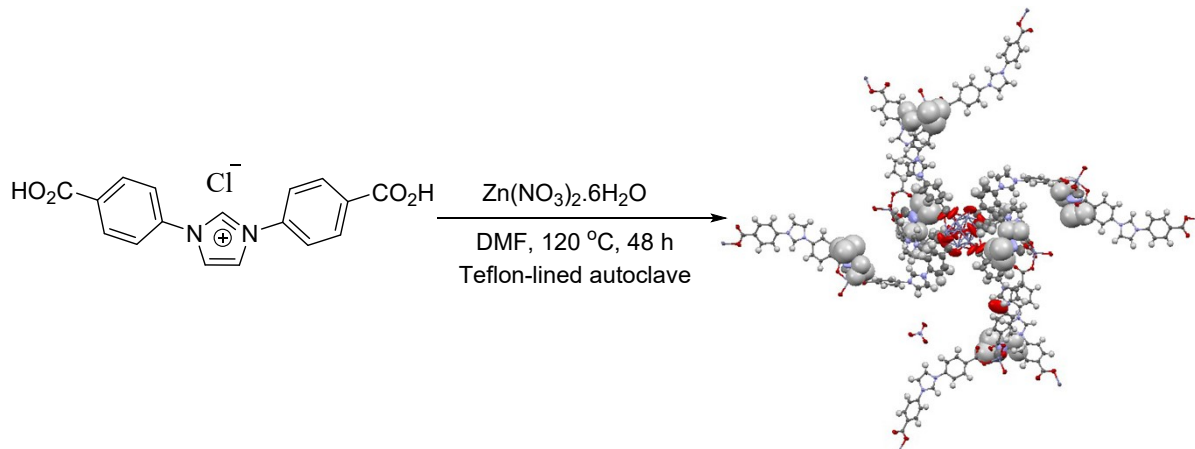

**Scheme S1:** Preparation of MOF-Zn-NHC as *N*-Heterocyclic carbene

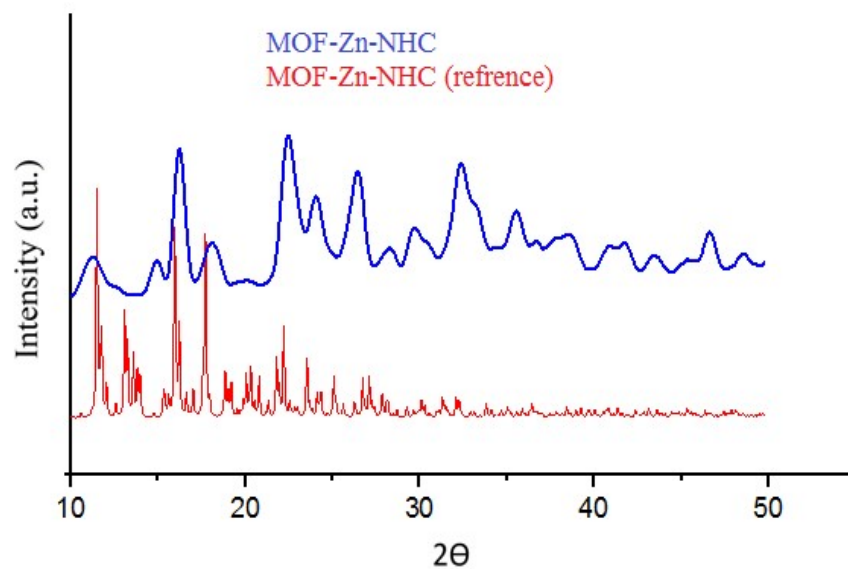

**Figure S1:** XRD diagram for the MOF-Zn-NHC (Blue line) in compare with MOF-Zn-NHC (Red line)

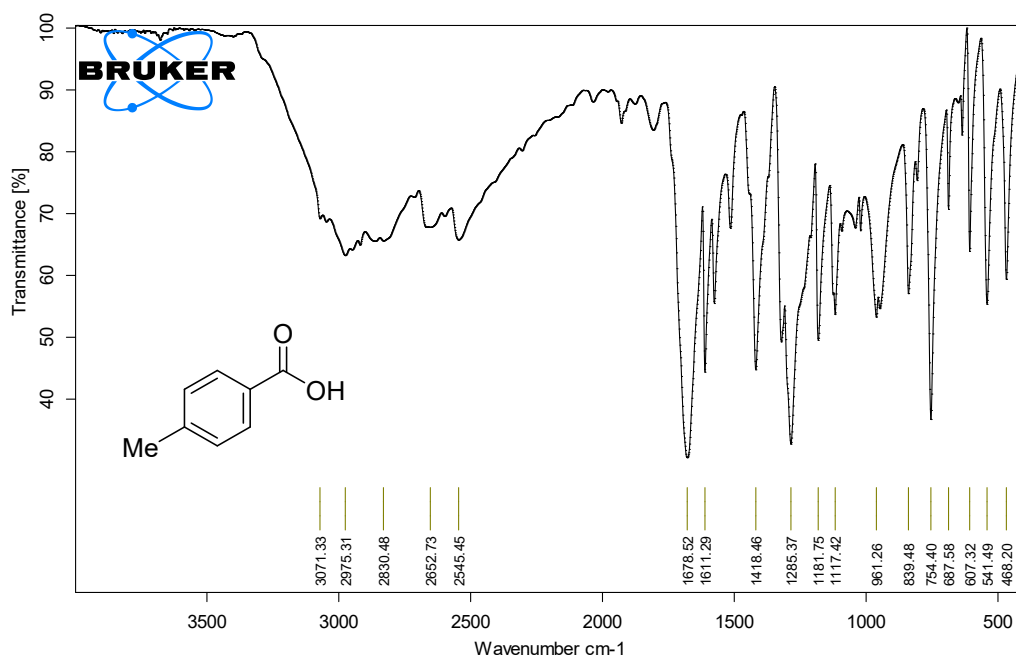

FT-IR spectrum of 4-methylbenzoic acid

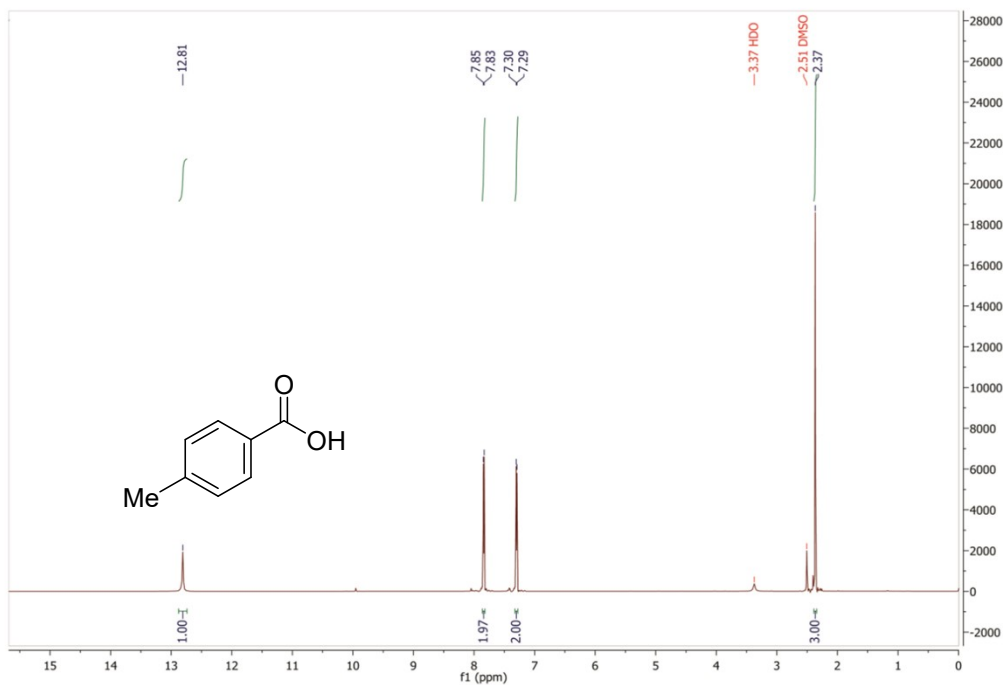

<sup>1</sup>H NMR spectrum of 4-methylbenzoic acid

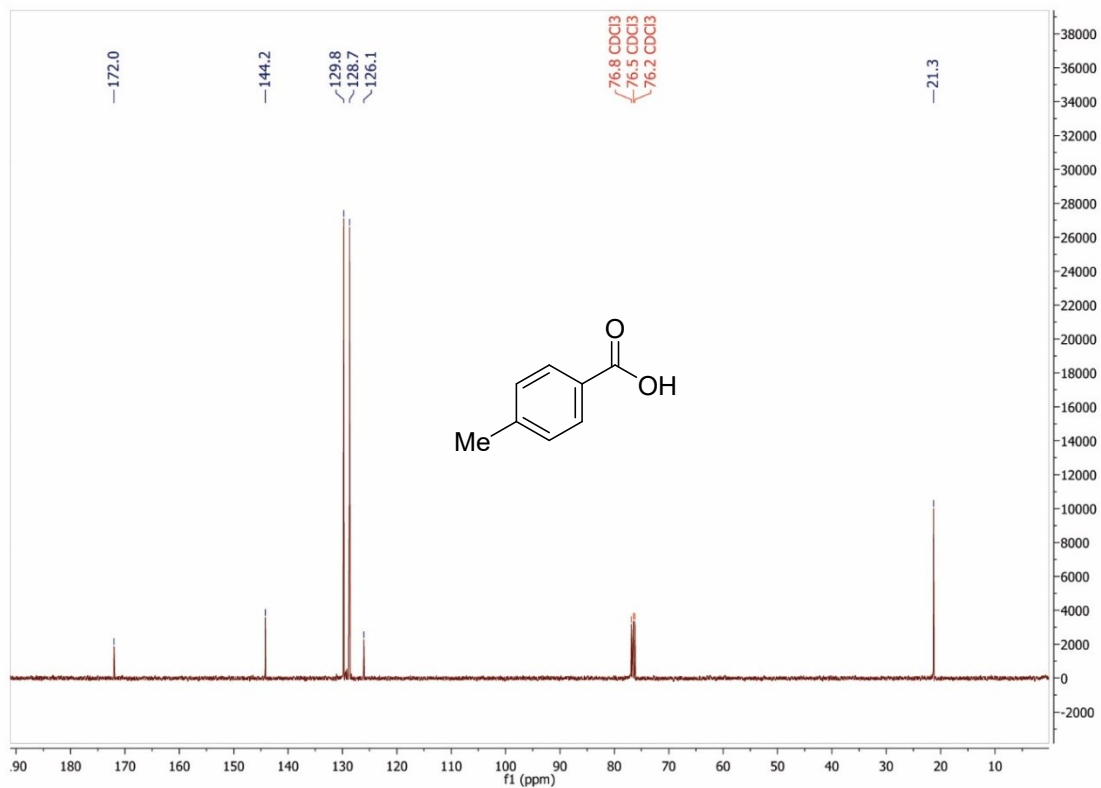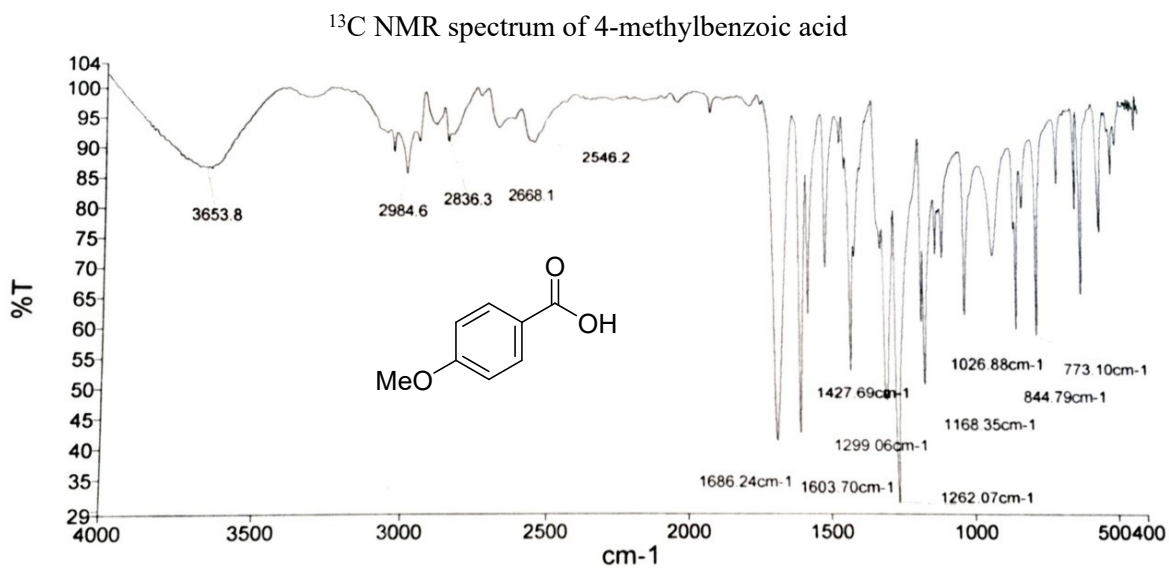

FT-IR spectrum of 4-methoxybenzoic acid

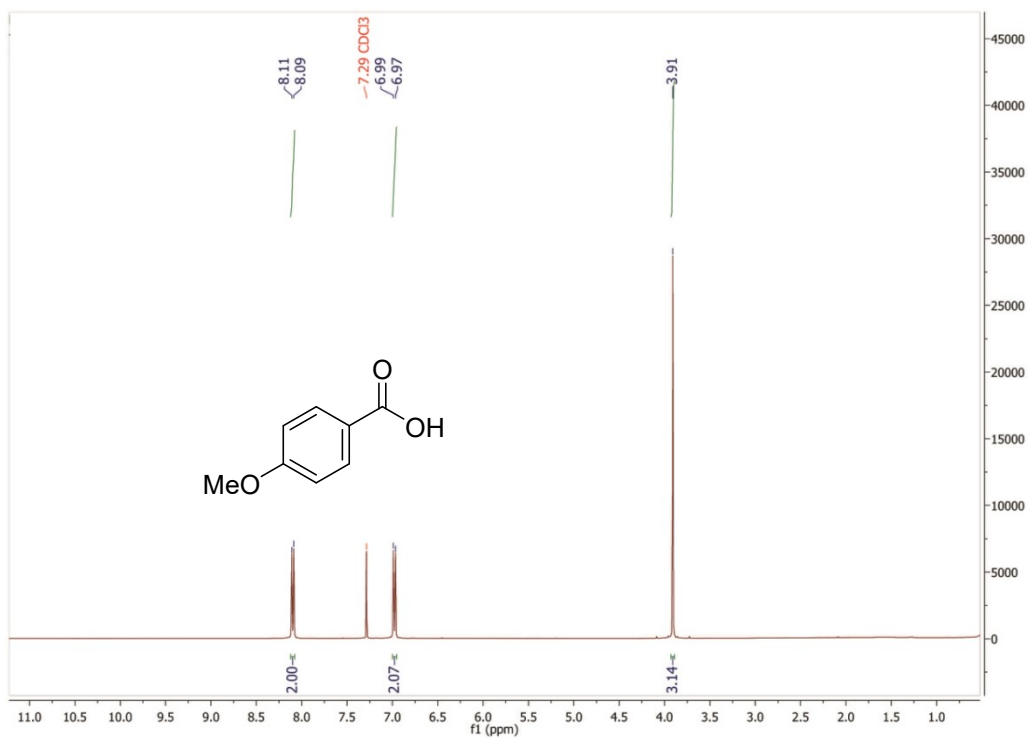

<sup>1</sup>H NMR spectrum of 4-methoxybenzoic acid

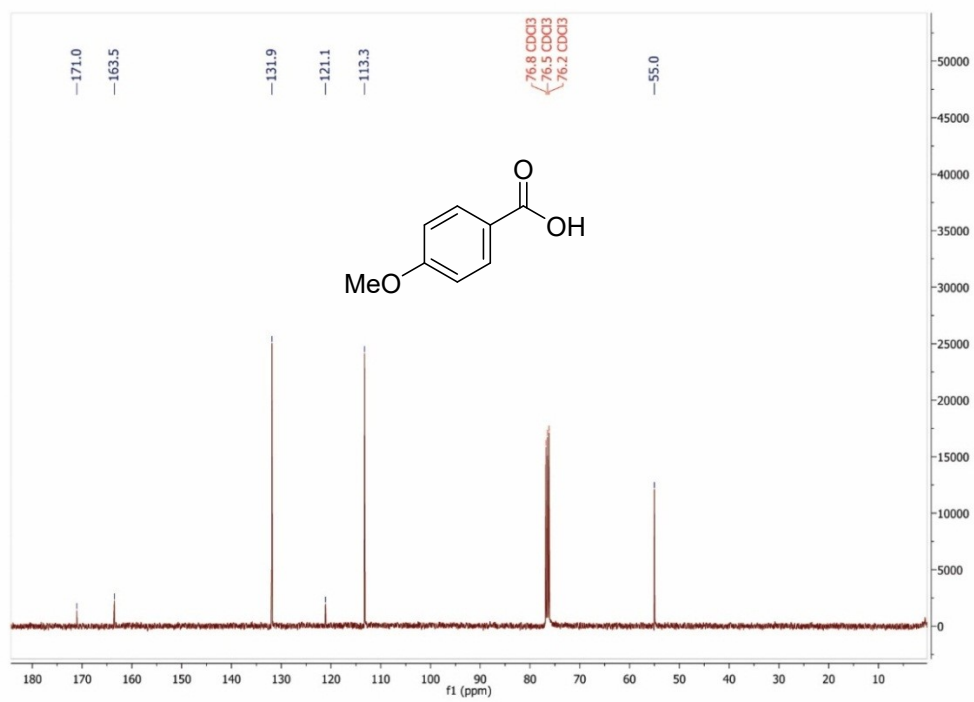

<sup>13</sup>C NMR spectrum of 4-methoxybenzoic acid

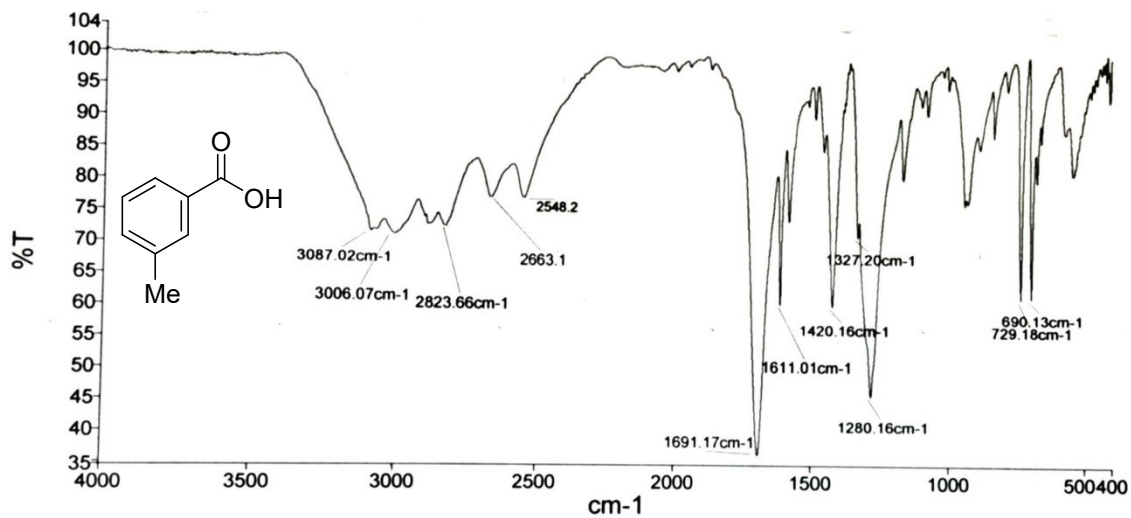

FT-IR spectrum of 3-methylbenzoic acid

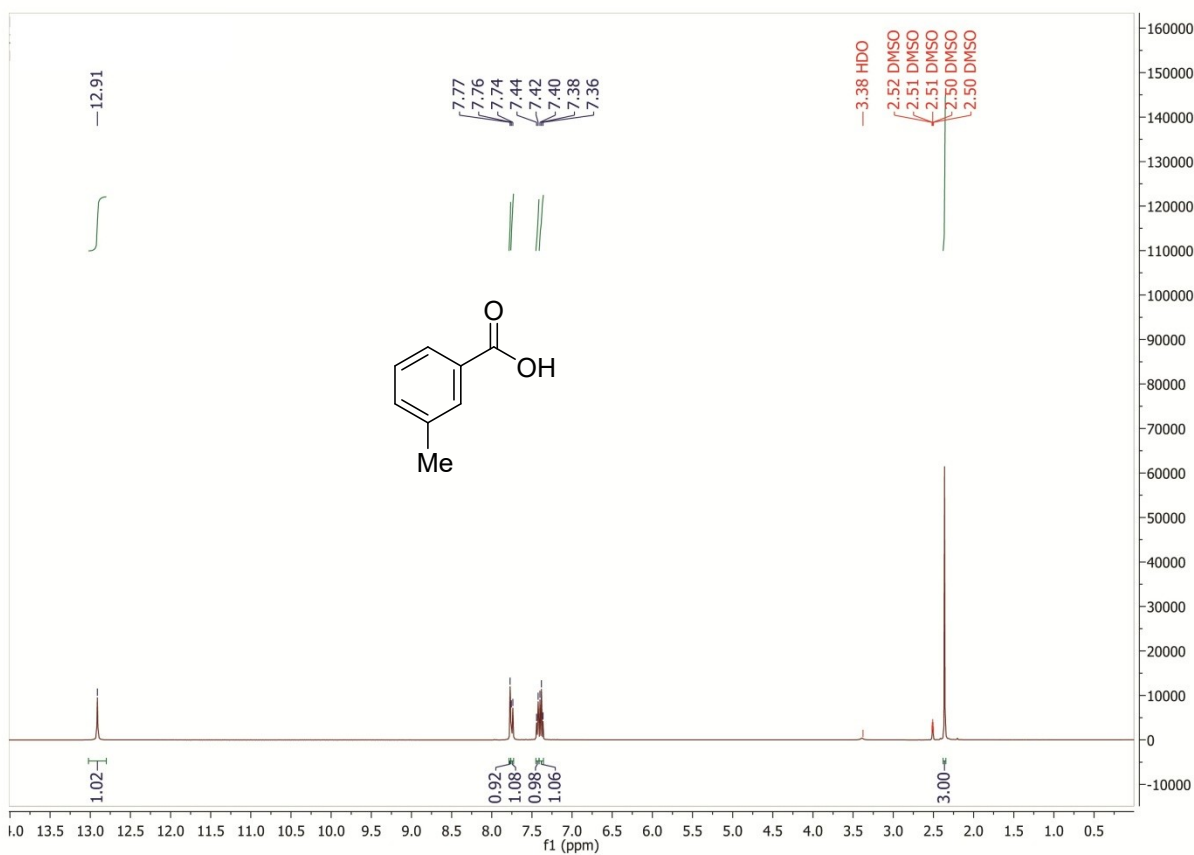

<sup>1</sup>H NMR spectrum of 3-methylbenzoic acid

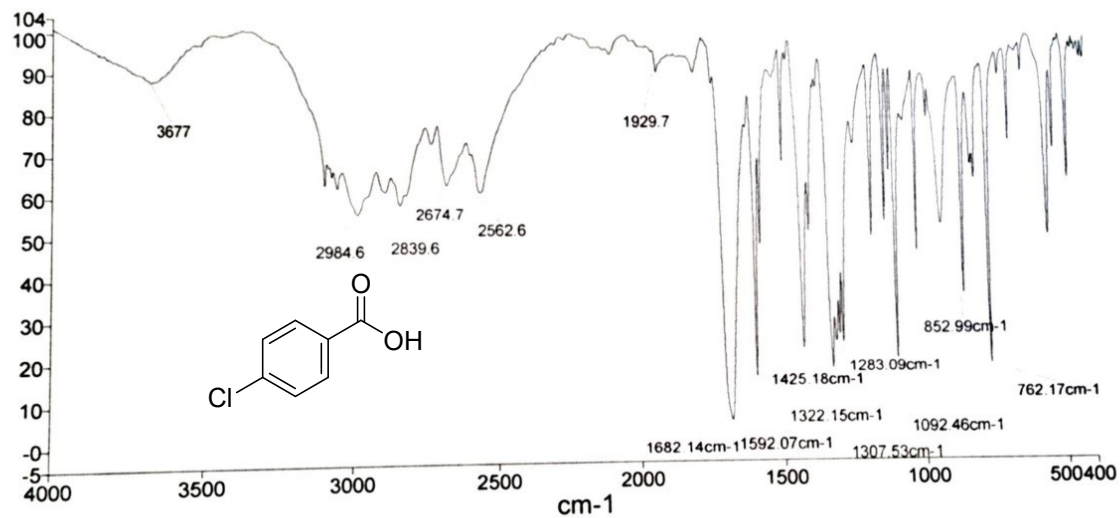

FT-IR spectrum of 4-chlorobenzoic acid

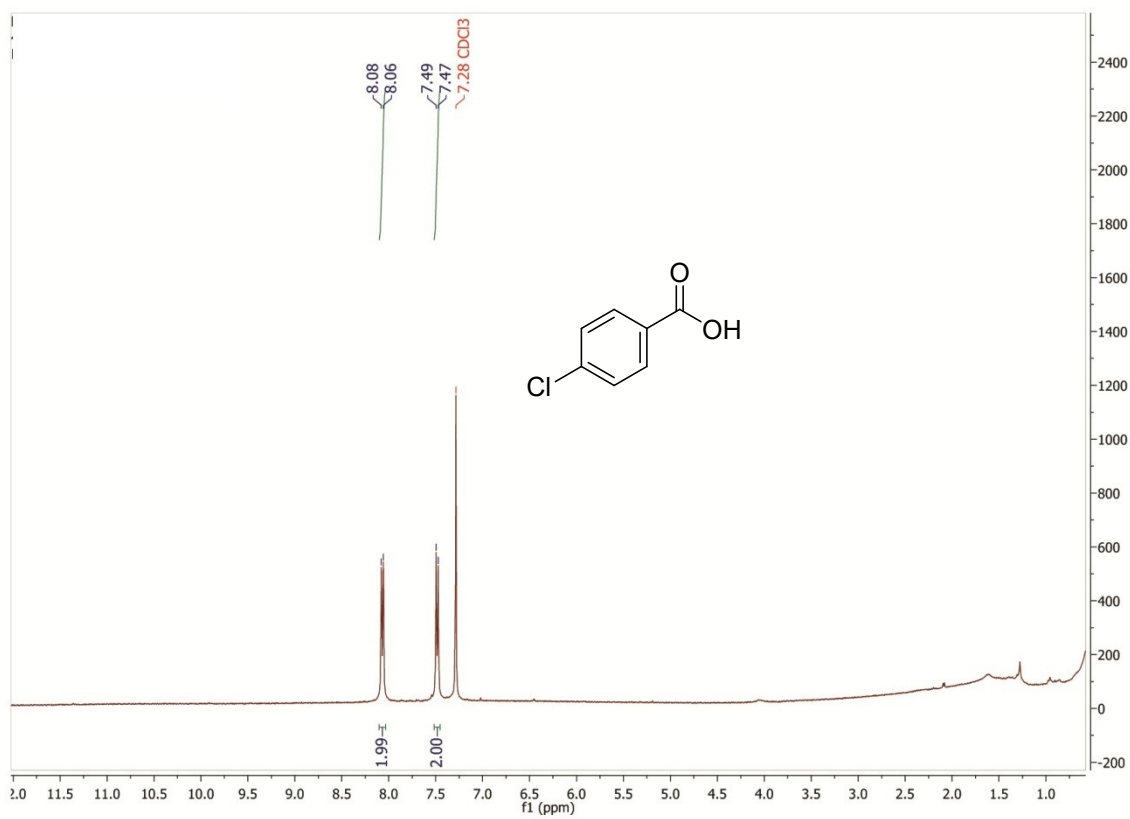

<sup>1</sup>H NMR spectrum of 4-chlorobenzoic acid



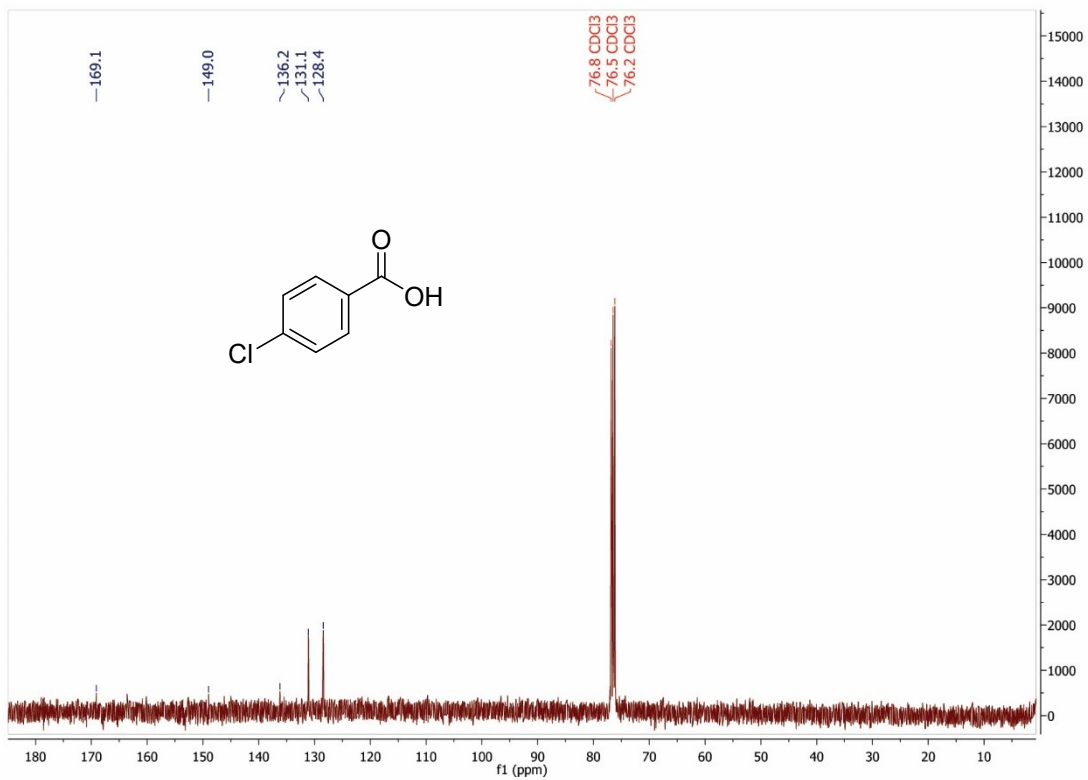

<sup>13</sup>C NMR spectrum of 4-chlorobenzoic acid

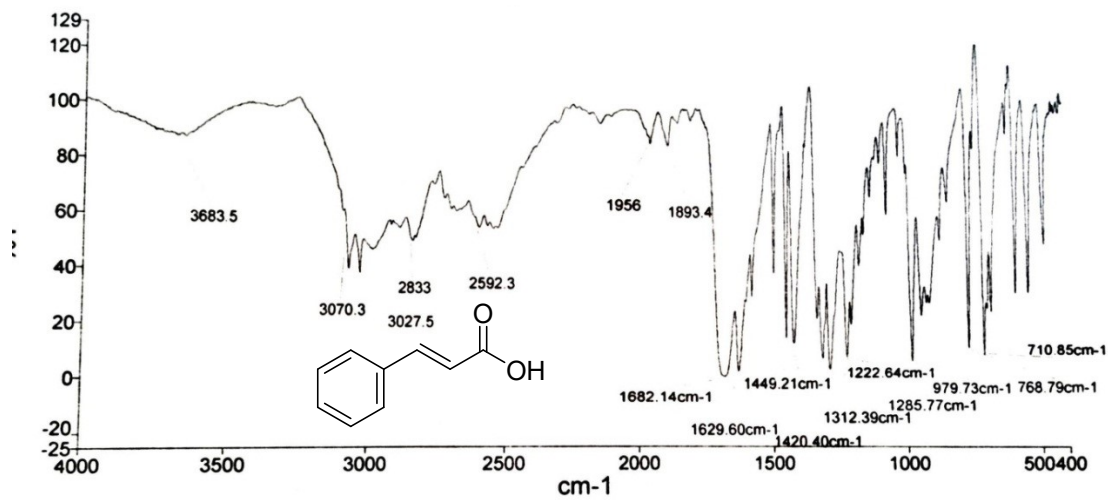

FT-IR spectrum of cinnamic acid

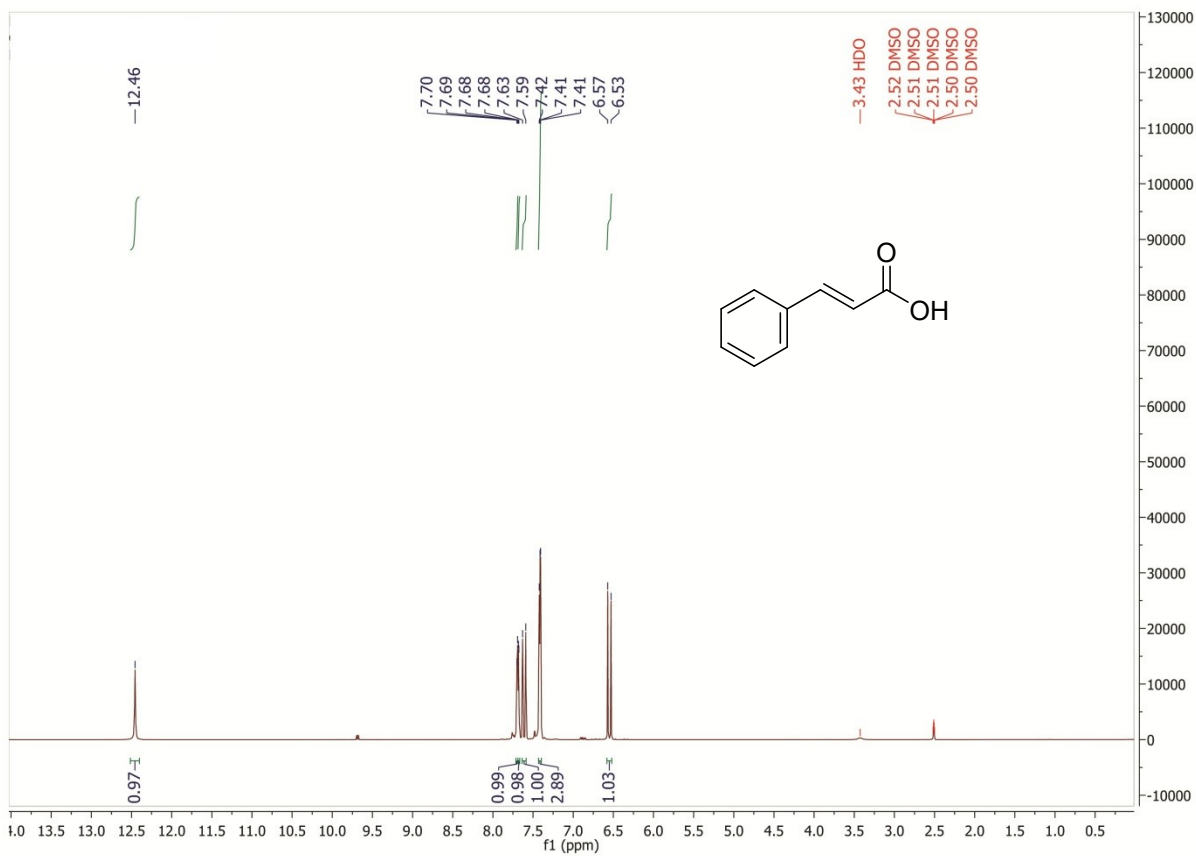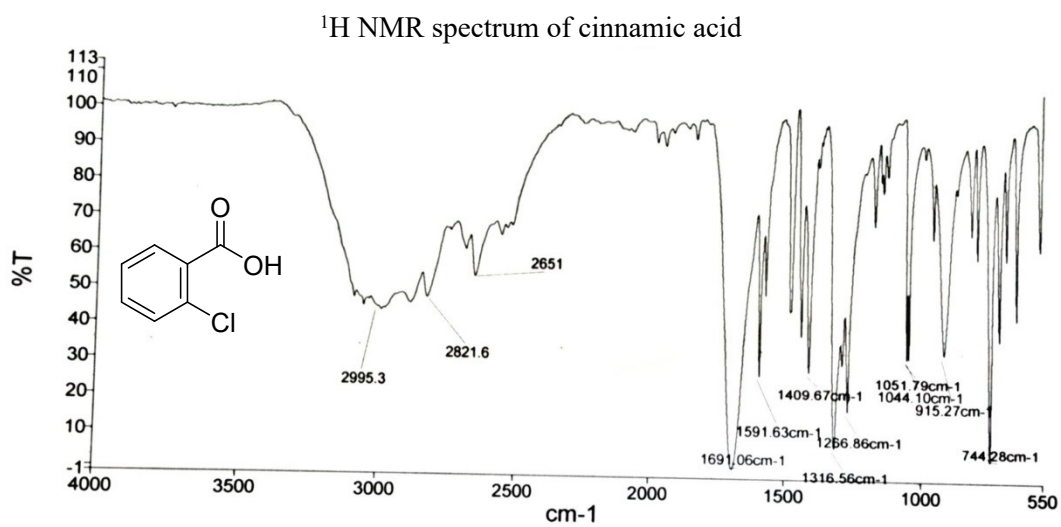

FT-IR spectrum of 2-chlorobenzoic acid

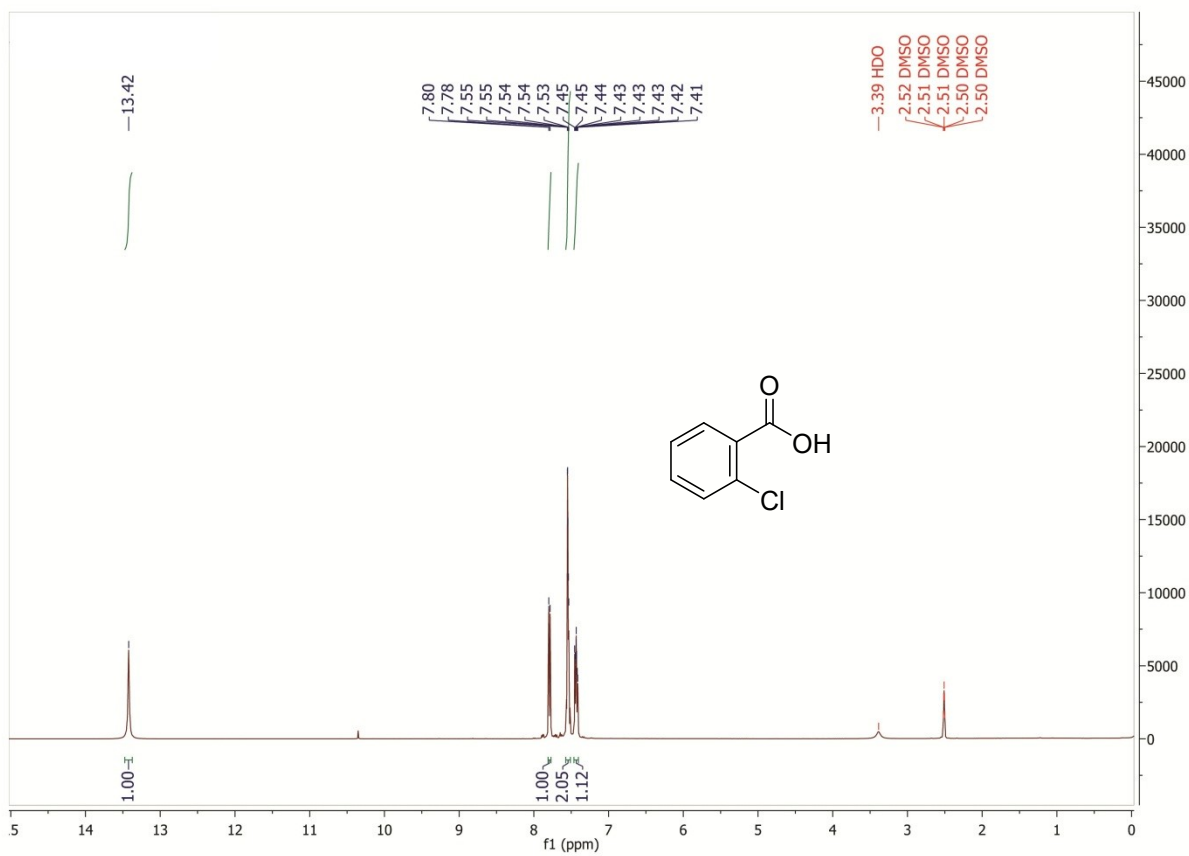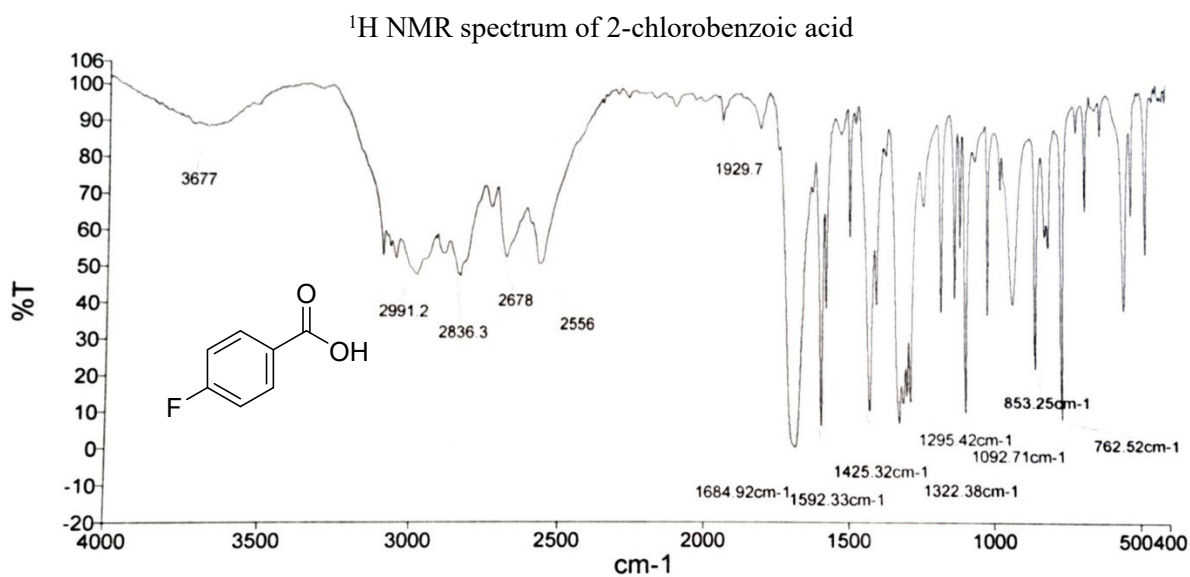

FT-IR spectrum of 4-fluorobenzoic acid

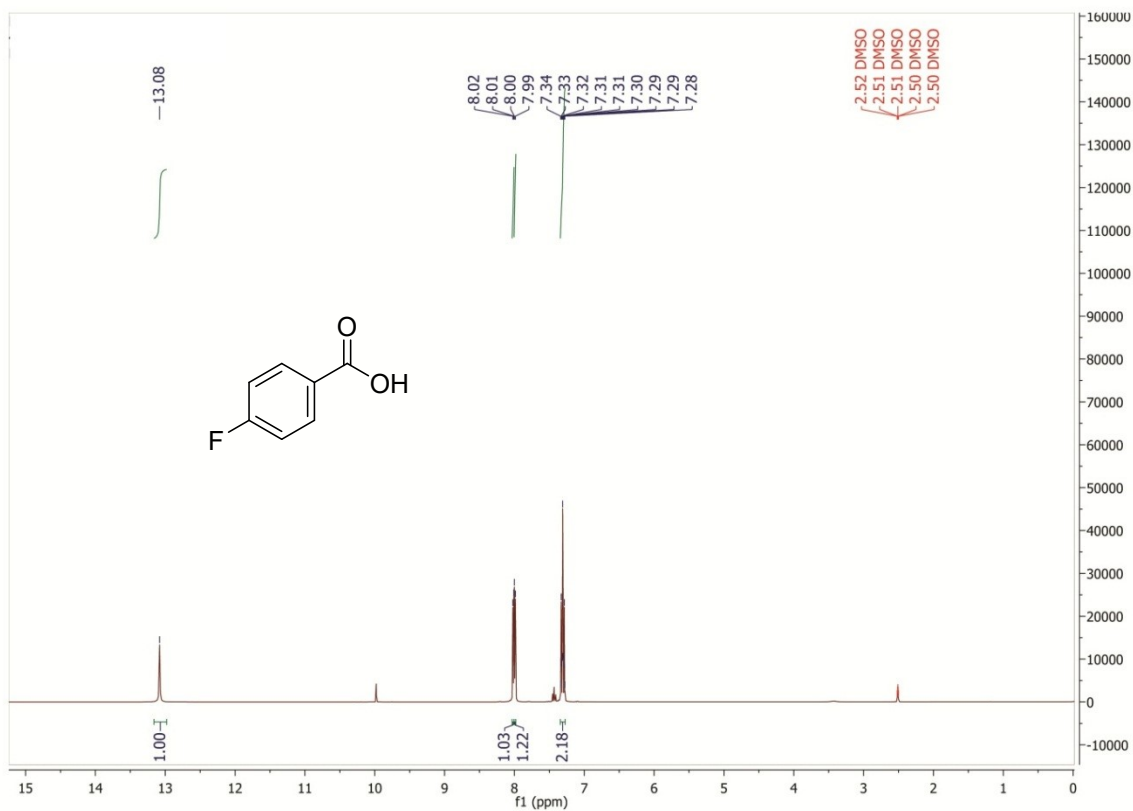

<sup>1</sup>H NMR spectrum of 4-fluorobenzoic acid

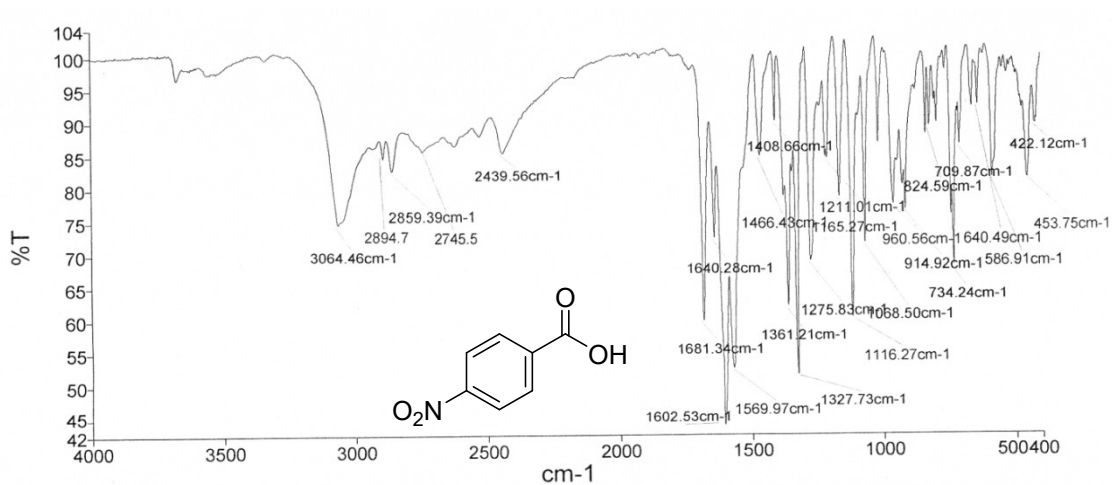

<sup>1</sup>H NMR spectrum of 4-nitrobenzoic acid

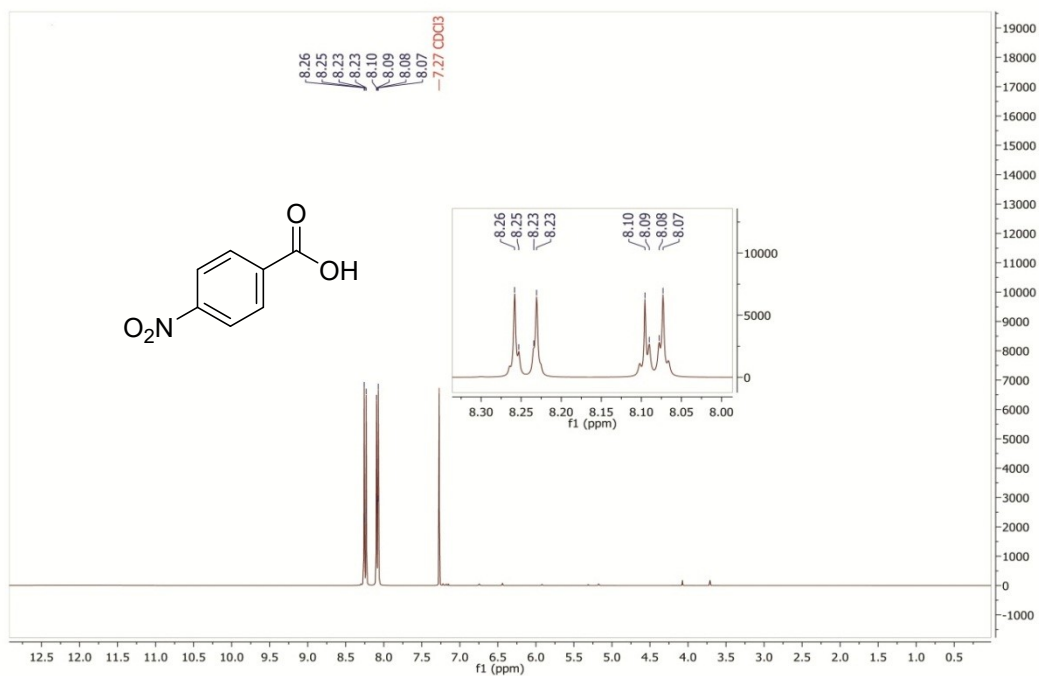

<sup>1</sup>H NMR spectrum of 4-nitrobenzoic acid

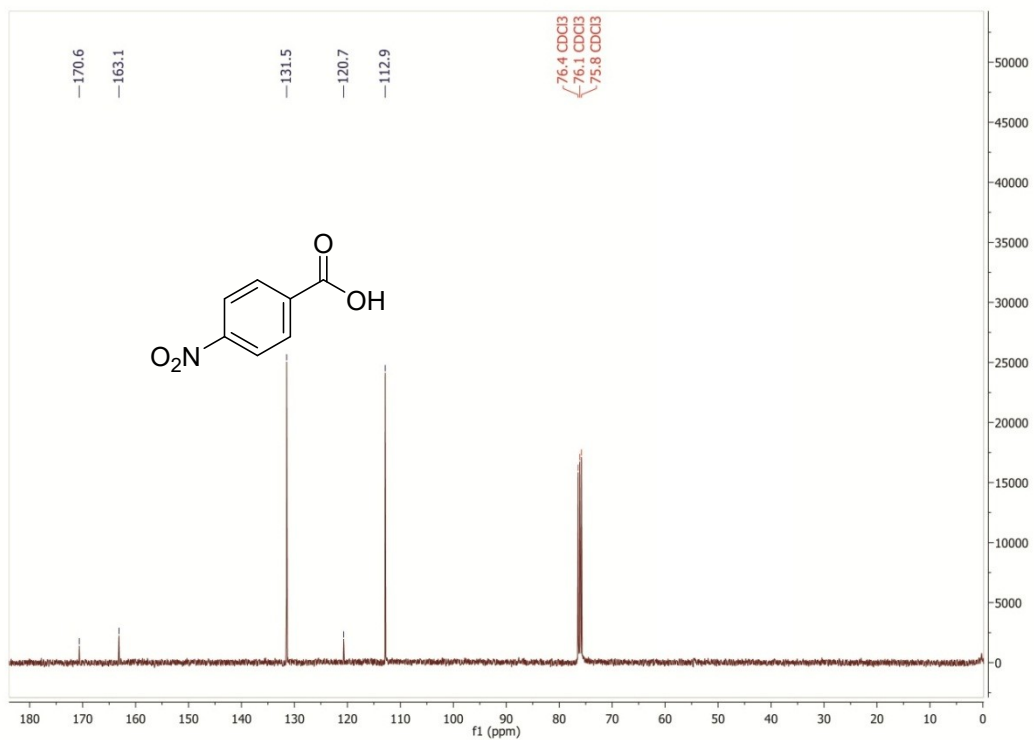

<sup>13</sup>C NMR spectrum of 4-nitrobenzoic acid

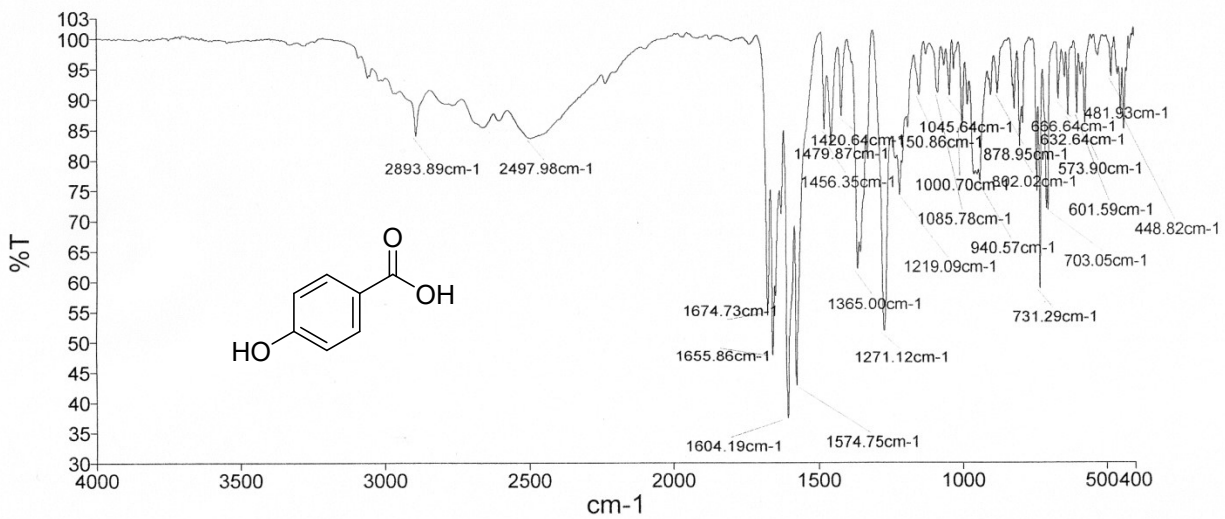

FT-IR spectrum of 4-hydroxybenzoic acid

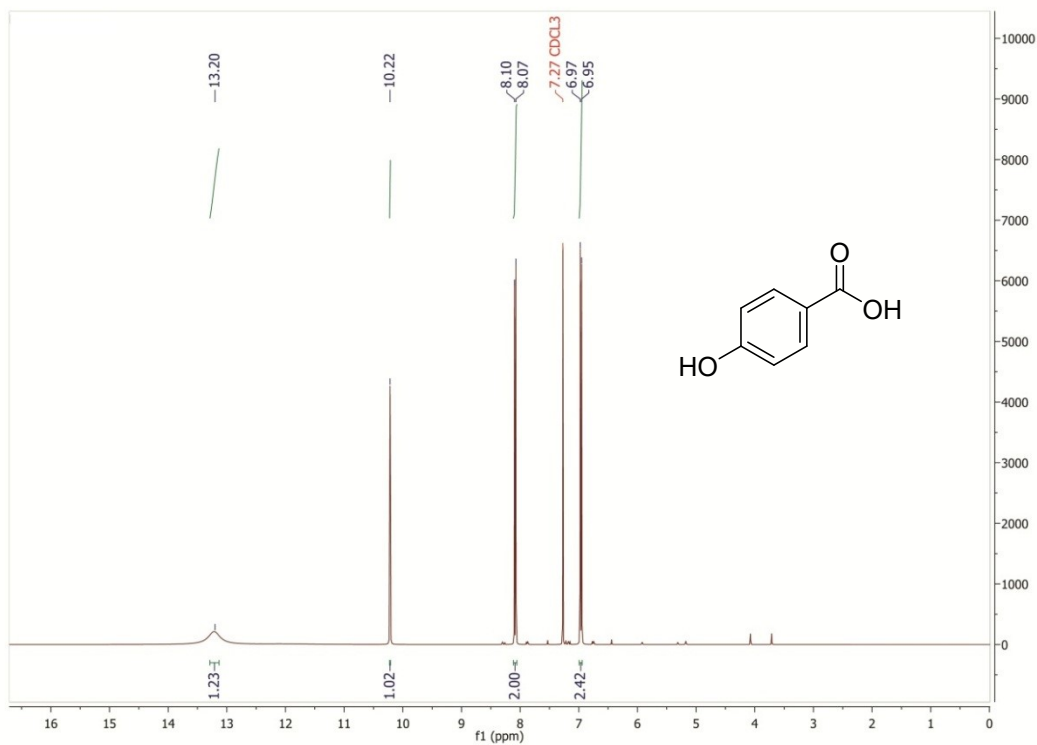

<sup>1</sup>H NMR spectrum of 4-hydroxybenzoic acid

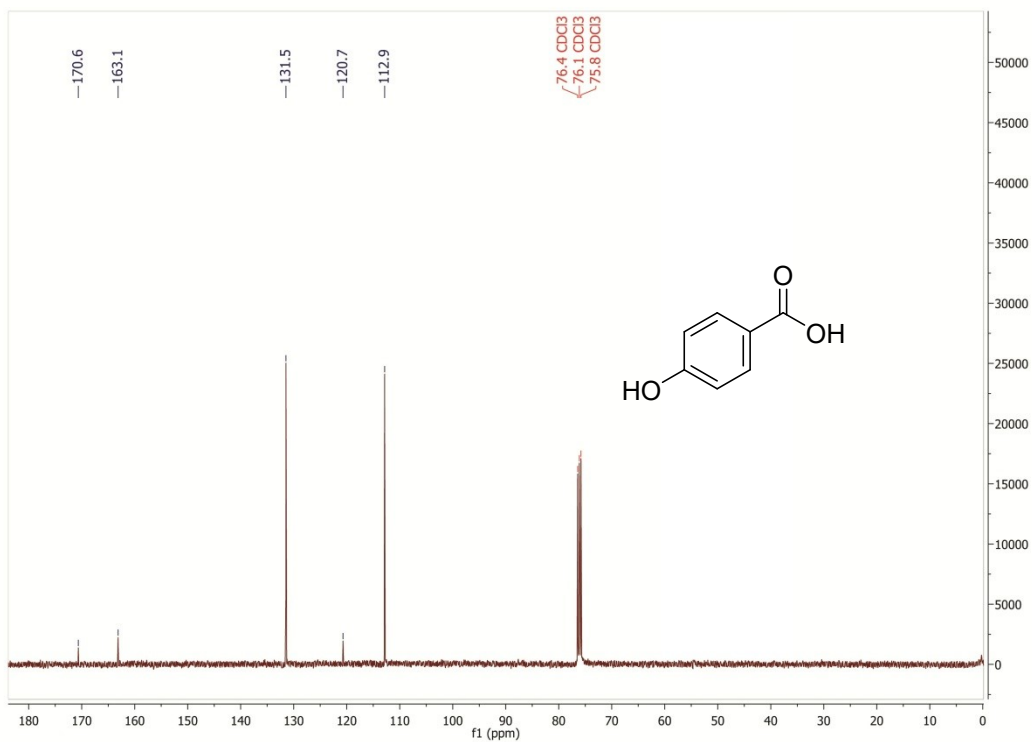

$^{13}\text{C}$  NMR spectrum of 4-hydroxybenzoic acid

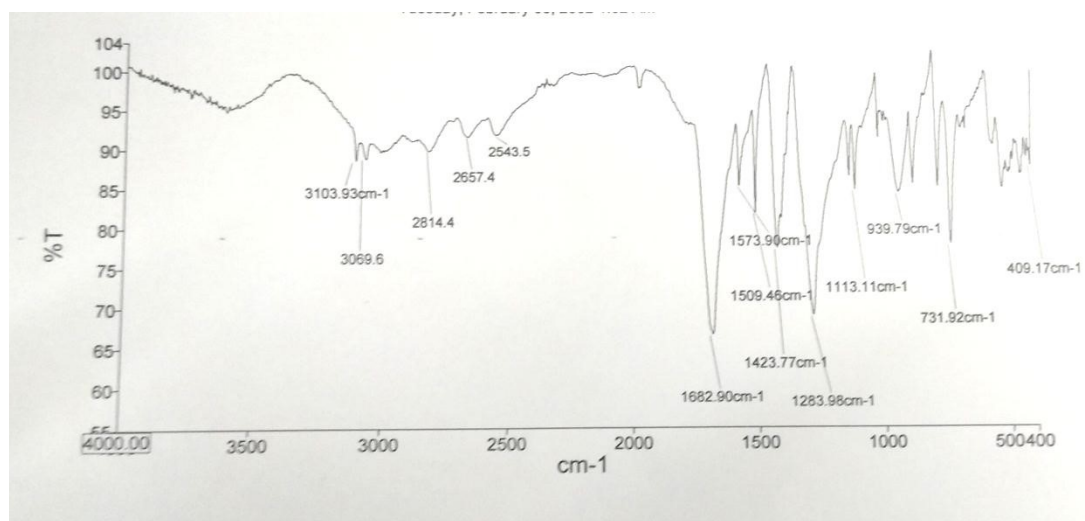

FT-IR spectrum of Isophthalic acid

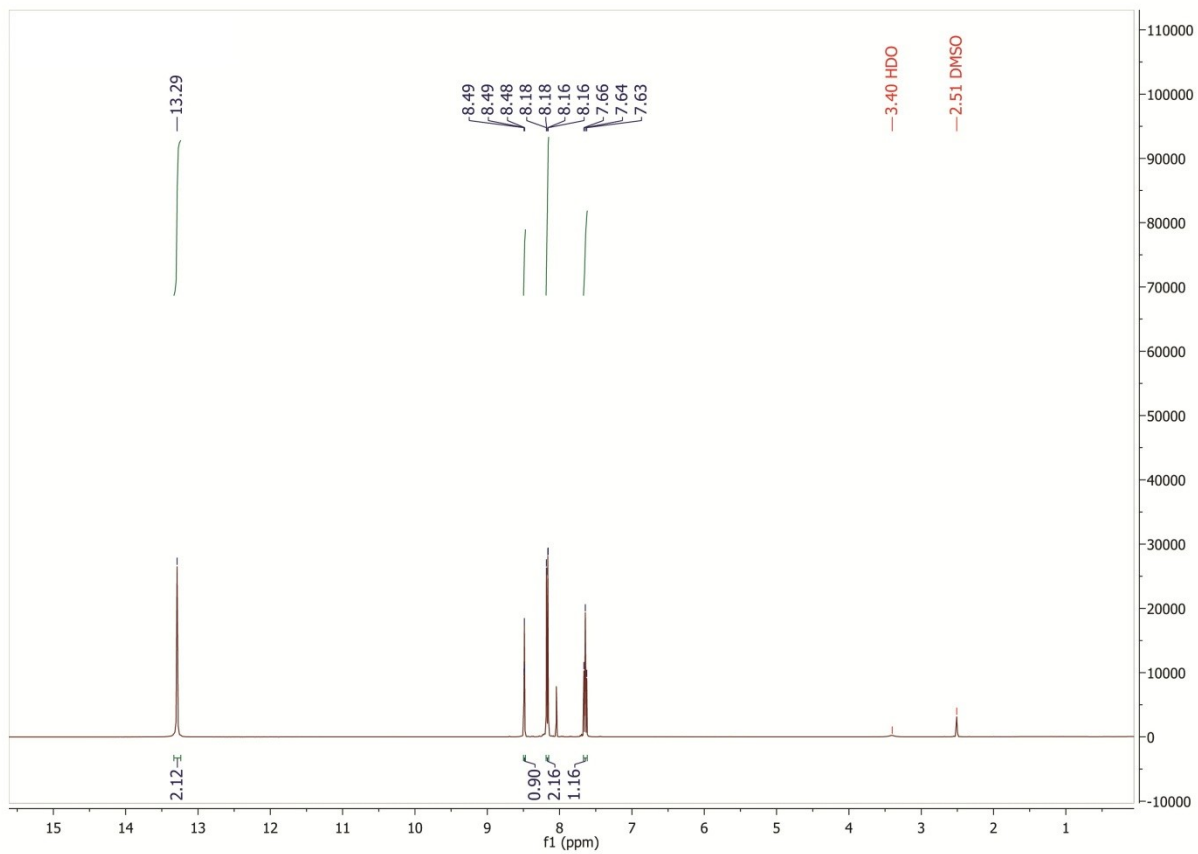

<sup>1</sup>H NMR spectrum of Isophthalic acid
